1

2

3 Competition in the savanna: models of species assemblages in Kruger National Park, South

4 Africa

5

6

7 Sadie J. Ryan<sup>1\*</sup> and Joshua Ladau<sup>2</sup>

8

9 <sup>1\*</sup>Corresponding Author: Sadie J. Ryan, Department of Geography, University of Florida,

10 Gainesville, FL 32601, USA, [sjryan@ufl.edu](mailto:sjryan@ufl.edu)

11

12 <sup>2</sup>Gladstone Institutes GICD, 1650 Owens Street San Francisco, CA 94158, USA

13

14

15

16 **Abstract**

17 We examined hypotheses of spatial association arising from direct or indirect competitive  
18 interactions, using thirteen years of gridded mammal census data from Kruger National Park,  
19 South Africa. As interactions occur at different scales, we explored the data at 1, 5, 10, and 15  
20 km<sup>2</sup>. We proposed four hypotheses structuring the mammal community: H1. direct competition  
21 between carnivores and herbivores; H2-4: indirect competition produced by each of three types  
22 of herbivore diet specialization: H2. ruminants and non-ruminants, H3. grazers and browsers,  
23 and H4. a four-way division of small and large grazers and browsers. We used the software  
24 CoOccur to implement a robust test for evidence of our hypotheses against null models of  
25 community assemblage. At 5, 10, and 15km<sup>2</sup> scales, the results supported a competition  
26 mechanism in the majority of years for hypotheses H1, H3, and H4, and facilitation in H2. At the  
27 finest spatial scale (1km<sup>2</sup>), we saw evidence for a mixture of competitive, neutral and facilitative  
28 process. These results suggest strong, large-scale effects of interspecific interactions on  
29 distributions of African megafauna, which may not operate at a more local (1km<sup>2</sup>) scale,  
30 underscoring the importance of scale and mechanism in the guild structure of communities.

31  
32 **Keywords:** competition; co-occurrence; savanna; carnivores; herbivores; guilds; South Africa;  
33 scale

34

## 35 **Introduction**

36 Understanding and describing how species interactions structure communities remains a  
37 fundamental goal of ecology (Diamond 1975, Connor and Simberloff 1979, Schoener 1983,  
38 Schluter 1984, Stone and Roberts 1990, Manly 1995, Durant 1998, Roxburgh and Matsuki 1999,  
39 Linnell and Strand 2000, Gotelli 2000, Gotelli and McCabe 2002, Gotelli and Ellison 2002,  
40 Sfenthourakis et al. 2006, Ulrich et al. 2017). Understanding community structure requires both a  
41 spatial and temporal perspective (Linnell and Strand 2000), but few datasets are available that  
42 are expansive in both of these scales, in part due to declining sizes and numbers of remnant intact  
43 wild populations. We present an analysis of long-term, multi-scale, spatially explicit census data  
44 of savanna mammals (Table 1) in Kruger National Park, South Africa, testing hypotheses of  
45 competition that shape the mammalian assemblage on the landscape. Using census data from a  
46 large landscape (approximately 20,000 km<sup>2</sup>) over multiple years gives us the opportunity to  
47 respond to the call by Linnell and Strand (2000) for more research into temporal and spatial  
48 aspects of species co-existence, when discussing diverse guilds and communities. Using thirteen  
49 years of data, we could assess whether patterns were consistent through time, and these data also  
50 allowed us to examine patterns at multiple scales, to quantify the potential extent of behavioral  
51 and ecological processes structuring communities.

52

## 53 ***Savanna community structure***

54 Carnivores are likely to shape savanna communities by acting as top predators (Radloff and Toit  
55 2004, Pringle et al. 2007), excluding their prey through direct competition from predation, or via  
56 prey avoidance and vigilance behavior (Schmitz 2007). This is expected to generate patterns of  
57 competitive exclusion in presence-absence data. We analyzed data collected on larger carnivores

58 in the Felidae (lion, cheetah, leopard) and Canidae (Black-Backed Jackal, Wild dog), plus the  
59 hyena and the honey badger. As the predator trophic level, they are more sparsely represented in  
60 the data than their prey, but are nevertheless expected to exert detectable effects on the structure  
61 of the community.

62 For large herbivores, the two dominant processes structuring assemblages in African  
63 savannas are facilitation and competition (Arsenault and Owen-Smith 2002). Interspecific  
64 competition predominates during the dry season, while plants are dormant and high quality  
65 forage becomes depleted. Therefore, it has been suggested that in the dry season, this will lead to  
66 competition among species with similar requirements, subject to habitat heterogeneity at  
67 different scales (Redfern et al. 2006). As these census data were collected during the dry season,  
68 we expect a dominance of interspecific competition to be occurring. At large scales, abiotic  
69 characteristics of the landscape, such as underlying geology, will affect herbivore distribution  
70 (Bailey et al. 1996). At smaller scales, biotic factors such as forage quality and quantity will  
71 determine foraging decisions. The selection of feeding ranges, patches, plant species, and even  
72 plant parts, will occur at multiple scales (Senft et al. 1987, Senft 1989). Arsenault and Owen-  
73 Smith (2002) suggested that facilitation occurs primarily during the plant growing season, as  
74 foraging by larger species can create a temporary improvement of forage conditions for smaller  
75 species.

76 However, the spatial co-occurrence of herbivores may also result from habitat selection –  
77 species feeding in the same area – rather than causal facilitation. Landscape configuration may  
78 thus generate patterns of apparent facilitation, depending on the scale of selection. Distinguishing  
79 behavioral differences between these two processes, which would produce identical patterns in  
80 the data, requires direct observation and different methods than those we use here.

81           Based on existing theories of competition and community structure, we developed four  
82 hypotheses (H1-4) of mechanisms generating patterns of competition for the vertebrate  
83 community of Kruger National Park.

84           H1. We hypothesize that carnivores exclude their herbivore prey, either through direct  
85 predation, or prey avoidance strategies (trait-mediated indirect effects), showing competitive (a  
86 lack of co-occurrence) patterns at multiple scales.

87           H2-4: Within the herbivore suite, we hypothesize that interference competition structures  
88 the assemblage via the ability to process food, leading to indirect competition through resource  
89 manipulation or interspecific competition for similar diet or habitat (de Boer and Prins 1990).

90           H2: There is a guild division between ruminants and non-ruminants, based on the premise  
91 that gut morphology and digestive ability determine the ability to exploit certain habitats. We  
92 thus expect that each guild can exploit different habitats, leading to less co-occurrence of guilds,  
93 and a pattern consistent with competition.

94           H3: A smaller suite of herbivores with a higher degree of habitat overlap represent a  
95 guild division between grazers (Buffalo, Zebra, Wildebeest) and browsers (Elephant, Giraffe,  
96 Kudu, Impala). Grazers and browsers can putatively exploit different food types, leading to less  
97 spatial co-occurrence. While elephants are capable of grazing and browsing, since these data are  
98 primarily dry season occurrences, we expect to see elephant occurrence reflecting a browsing  
99 strategy. These herbivores will compete within feeding type (guild), although not necessarily  
100 between feeding types, leading to indirect competition and generating a pattern consistent with  
101 competition.

102           H4: Competitive structure within the assemblage can arise through a combination of  
103 feeding type and body size. This generates indirect competition through highly specialized

104 feeding strategies. Four guild divisions are designated: 1. Large grazers (Buffalo) 2. Small  
105 grazers (Zebra and Wildebeest) 3. Large browsers (Elephant) 4. Small browsers (Giraffe, Kudu,  
106 Impala) (7 species), following Redfern et al. (2006) (and see Table 2). Feeding type and body  
107 size will affect competitive ability for resources, and this will likely occur between different  
108 species at different spatial scales, and generate a pattern consistent with competition.

109

### 110 *Models of community assemblage*

111 The underlying ecological mechanisms and rules of community assemblage have been the  
112 subject of studies in multiple systems (Diamond 1975, Connor and Simberloff 1979, Schoener  
113 1983, Schluter 1984, Stone and Roberts 1990, Manly 1995, Durant 1998, Roxburgh and Matsuki  
114 1999, Linnell and Strand 2000, Gotelli 2000, Gotelli and McCabe 2002, Gotelli and Ellison  
115 2002, Sfenthourakis et al. 2006). Quantifying these patterns, or lack thereof, has led to a long  
116 debate in the literature (reviewed by Gotelli and McCabe 2002), sparked by an initial study by  
117 Diamond (1975) positing that species assemblages occur through competitive interactions and  
118 rebutted by Connor and Simberloff four years later (1979), who demonstrated that random events  
119 of colonization could produce similar co-occurrence patterns.

120 Connor and Simberloff's (1979) initial introduction of null models of community  
121 structure was motivated by an interest to understand which mechanisms (e.g., competition) were  
122 responsible for co-occurrence patterns. We follow this approach, developing null model tests  
123 based on our specific hypotheses of the ecological mechanism of competition shaping the  
124 community structure in question. We use a null model, developed by Ladau and Schwager  
125 (2008), that yields a prediction assuming only an absence of competitive interactions (i.e., that

126 species occur independently of each other). Hence, finding data that are inconsistent with this  
127 model allows a strong inference about whether competition shapes community assembly.

128

## 129 **Methods**

### 130 *Study site*

131 The Kruger National Park is located in the lowveld of South Africa, with a core area of nearly  
132 20,000km<sup>2</sup>, at the time of data collection. It has a north-south rainfall gradient of around 440mm-  
133 750mm and is dominated by four major landscapes, essentially dividing the park into quadrants  
134 due to a basalt/granite geological split the length of the park (Gertenbach 1980, 1983, Redfern et  
135 al. 2006) (Figure 1).

136

### 137 *Data*

138 We analyzed the annual fixed-wing census from Kruger National Park collected during 1981-  
139 1993. The Ecological Aerial Survey (EAS) was conducted annually, during the dry season  
140 between May and August, using a total area count on 800m-wide strip transects (Viljoen 1996a,  
141 1996b). Point counts of herds or groups of animals (listed in Table 1) were conducted by four  
142 observers in the plane, and recorded to spatial location by GPS, using four corners and a center  
143 point on a quadrat system approximately 2km on a side (Viljoen 1996a). The observation  
144 recording patterns changed between 1984 and 1985, in which the number of positions in a  
145 sample grid space recorded was increased from four corners to an additional centroid position  
146 (Viljoen 1996a, 1996b). This affects the 1km data structure by increasing the number of grid  
147 cells 4-fold between the two years. Although the method suffers population level bias from

148 undercounts (Redfern and Getz 2002), it is a systematic bias, allowing us to make appropriate  
149 hypothesis comparisons.

150

### 151 *Data sampling method*

152 We created grids of the park boundary at 1km, 5km, 10km, and 15km resolutions, and  
153 aggregated the EAS data species counts to grid cells, removing partial boundary grid cells from  
154 the analyses. The resulting data sets comprise 17,813, 621, 130 and 43 grid cells, or sites,  
155 respectively. GIS data manipulations were conducted in ArcGIS 10.2. These data were then  
156 converted to binary species presence-absence data in R.

157

### 158 *Statistical tests of species associations*

159 The EAS data we analyzed for each hypothesis comprise four subsets, sequentially reducing the  
160 number of species (Table 2).

161 The competition model from which the null model is developed is based on two premises:

- 162 I. Regardless of how competition acts – evolutionarily or ecologically, and extrinsically or  
163 intrinsically – it will reduce the co-occurrence of ecologically similar organisms, which we  
164 refer to as guilds.
- 165 II. Ecological similarity can be specified using a hierarchical classification system. Species can  
166 be classified into “units,” with species in the same unit being more ecologically similar to each  
167 other than those in different units. The quality of “units” can be interpreted, for example, as  
168 guilds or trophic levels, depending on the hypothesized structure of competition or interactions.

169 Defining the  $\langle ij \rangle$  as the event that the  $i$ th and  $j$ th species to arrive at a community belong  
170 to the same unit, competitive structuring predicts



171 
$$P(\langle 13 \rangle | \langle 12 \rangle) < P(\langle 13 \rangle | \langle 12 \rangle^c), P(\langle 23 \rangle | \langle 12 \rangle) < P(\langle 23 \rangle | \langle 12 \rangle^c),$$

172 or

173 
$$P(\langle 34 \rangle | \langle 23 \rangle \cap \langle 12 \rangle^c) < P(\langle 34 \rangle | \langle 23 \rangle^c \cap \langle 12 \rangle^c),$$

174 (where  $c$  denotes complement). Thus, an appropriate null hypothesis for testing for the absence

175 of interspecific interactions is to set all relevant pairs of conditional probabilities equal. This

176 alone is sufficient to specify a distribution on the set of partitions of species into units, with

177 minimal additional assumptions: there is no autocorrelation, and  $P(\langle ij \rangle) > 0$  for all  $i$  and  $j$ .

178 Hence, to test robustly for interspecific interactions, it is sufficient to assess the agreement

179 between observed and predicted distributions of partitions.

180 The hypothesis test that we used was as follows:

- 181 1. At each site, in this case, a grid cell, the partition of species into units was computed. For  
182 example, if three species were observed, two in the same unit (guild) and the other in a  
183 different one, then the partition would be “2-1.” If four species were observed, all in different  
184 units (guilds), the partition would be “1-1-1-1.”
- 185 2. We computed the total sum of squares of the block sizes across all partitions. In the above  
186 example, the sum would be  $2^2 + 1^2 + 1^2 + 1^2 + 1^2 = 9$ . We used this sum as our test  
187 statistic ( $V$ ).
- 188 3. Conditional on the observed number of species ( $c$ ) and units ( $u$ ), the probability of a given  
189 partition  $I$  is  $\psi(I)/S(c, u)$ , where  $\psi(I)$  gives the number of set partitions corresponding to  
190 the given species-unit partition, and  $S$  is a Stirling number of the second kind - the number of  
191 possible ways to partition  $n$  elements into  $k$  non-empty subsets. Conditional on the number of

192 species observed at each site, we used this result to compute the expectation value and  
193 variance of the sum of squares at each site.

194 4. With the computed expectation values and variances for each site, we used a 2-tailed test for  
195 patterns of both competition and facilitation ( $\alpha=0.05$ , Lyapunov CLT). We also used a one-  
196 tailed version (Ladau and Schwager 2008), which has power to reject the null hypothesis  
197 only if the deviation from it is consistent with effects of competition. This test is uniformly  
198 most powerful (UMP) against a broad range of alternatives consistent with competition. We  
199 also numerically confirmed that tests had adequate power ( $>0.80$ ).

200 We implemented this test using software “CoOccur” written in Visual Basic 6.0,  
201 developed by the authors, and available online (<http://www.sadieryan.net/cooccur.html>). We  
202 summarized the results for each hypothesis in Table 3, and report the significance, size and  
203 power of the one- and two-tailed tests in full in Supplemental Table 1.

204

## 205 **Results**

206 The results varied by both scale and hypothesis in question. Results for potential predation  
207 effects (H1), at both 5km and 10km, suggested competition in all years ( $p<0.05$ ) and 8 of 13  
208 years at 15km resolution ( $p<0.05$ ). At 1km resolution, 2 years suggested competition ( $p<0.05$ );  
209 six years suggested facilitation ( $p=1.00$ ) and the other years were not indicative of a mechanism.

210 At 1km, the one-sided test only had sufficient size and power (minimum and maximum) for the  
211 first 4 years; the two-tailed test had sufficient size for these four years and for two additional  
212 years, but had insufficient power after the first four years. We thus cannot make robust  
213 conclusions after the first four years at the 1km scale.

214 Perhaps due to sparse observations of carnivores due to their low abundance, or due to  
215 the change in recording methods for observations, we found that the minimum criterion of ( $n$   
216 genera + 2)\* species) at a site was not always met, drastically reducing the power of the test for  
217 H1. This meant that tests at 1km, after 1984, had no power, and therefore did not produce  
218 reliable answers, including the 6 years' results suggesting facilitation. For the remaining 44 tests  
219 for H1, all the one-tailed tests had sufficient size and power, as did 43 of the two-tailed tests  
220 (Table 3, Table S1).

221 The ruminant and non-ruminant hypothesis (H2) for structure arising from competition,  
222 generated results indicating facilitation  $p=1.00$  at all scales in all years. The size and power of all  
223 tests for this mechanism was sufficient. For feeding competition between grazers and browsers  
224 (H3), all years and scales indicated competition ( $p<0.05$ ), except 1991 at 1km where  $p=0.05$ . All  
225 tests for this mechanism, both one and two-tailed, had sufficient size and power (see Table 3,  
226 Table S1).

227 H4 considered the contributions of grazing and browsing and also body size to  
228 competition; the test indicated competition in 9 of the years at a 1km resolution. At a 5km  
229 resolution, the test suggested competition in 8 of the years, and facilitation in 2 of the years. At  
230 both 10km and 15km resolution, competition was suggested by the test in all 13 years. The size  
231 and minimum and maximum power criteria were satisfied for both the one and two-tailed tests in  
232 all cases (Table 3, Table S1).

233 In all cases (4 mechanisms, 13 years, 4 resolutions; total: 208 cases), the Type I error rate  
234 of both the one and two-tailed tests were acceptably low. In addition, the power was sufficiently  
235 high for all cases, both one and two-tailed tests, with the exception of years 1985-1993 at 1km  
236 resolution for H1 (Table 3, Table S1).

237

## 238 **Discussion**

239 We sought to test hypotheses describing the mechanisms that may structure the community of  
240 savanna mammals on the Kruger National Park landscape, using tests for species assemblage that  
241 allow strong conclusions about mechanisms. We found support for competitive structure  
242 patterning for three of our four hypotheses, while the other suggested facilitation in all years.

243 Testing suites of species involved in specific guild structuring mechanisms meant we  
244 could explicitly formulate hypotheses. In addition, creating a software interface (CoOccur), in  
245 which the size and power of the test is explicitly evaluated, allowed us to explore potential  
246 pitfalls in attaining results, but thereby gave us confidence in our conclusions. For the one-tailed  
247 test, rejecting the null hypothesis indicates effects of competition (negative non-independence),  
248 while rejecting the null hypothesis in the two-tailed test can indicate competition or facilitation  
249 (positive non-independence).

250 We found evidence of competition at the 5km and 10km scales when carnivores were  
251 hypothesized to generate direct competition. We only found evidence for competitive structure  
252 for roughly 60% of the years in question at the largest scale (15km). A close examination of the  
253 years in question (Table 4) reveals no apparent temporal pattern, suggesting that this may be a  
254 sufficiently large spatial scale that direct competition may not always exert a strong effect. At the  
255 other extreme, at 1km resolution, for the four years with sufficient power, we found evidence for  
256 both competition and a lack of interactions. Evidence of direct competition effects via carnivore  
257 presence could indicate direct exclusion by predation, but more likely, behavioral avoidance of  
258 carnivores by prey species. Predator vigilance and avoidance has been cited as likely shaping

259 herbivore distributions for savanna mammals, even resulting in unpredictable apparent  
260 facilitation of herbivores, wherein mixed grazer herds group together (de Boer and Prins 1990).

261 In contrast to our expectation that the suite of herbivores might show evidence of  
262 resource competition based on the division of ruminants and non-ruminants (H2), we found  
263 evidence for facilitation at all scales, including the finer 1km scale. It is plausible that the test  
264 was instead detecting habitat selection, at least at large scales, consistent with apparent  
265 facilitation due to habitat selection. The ability to monopolize feeding patches at a scale relevant  
266 to these herbivores, in terms of home range or daily traveling distance (Estes 1991) (1km or  
267 5km), appears not to be conferred by ruminant ability. However, the more specialized herbivore  
268 suites, with guilds of grazers and browsers and even small and large body size (H3 and H4)  
269 showed patterns consistent with competitive structure (except one at 1km resolution). The  
270 grazer/browser guild showed competition at 5km, 10km, and 15km, and inclusion of body size as  
271 a factor also showed patterns consistent with competition at 10km and 15km resolutions, but was  
272 less consistent at 5km and 10km. As pointed out by Farnsworth et al. (2002), in theory,  
273 organisms sharing the same niche should competitively exclude each other to the point of one  
274 species going extinct. However, a model of specialization by plant parts suggests that grazers can  
275 co-exist on a landscape, if they can exploit different parts of plant structure. We found that if we  
276 partition the guilds along the lines of niche specialization, i.e. grazers and browsers, we start to  
277 find evidence of competitive structure. It is plausible that the very broad guilds of ruminants and  
278 non-ruminants show apparent facilitation due to clumping of herbivores on the landscape into  
279 preferred habitats.

280 Fritz (1997) conducted a comprehensive study on ungulate biomass at multiple sites in  
281 Africa to assess whether the patterns in these communities could be attributable to missing

282 predator guilds, or missing megaherbivores. These guilds both exert pressure on other sympatric  
283 guilds, but in slightly different ways, leading to interesting feedbacks on the relative abundance  
284 and biomass of medium-sized ungulates. In the study, he attributed the missing guild structure in  
285 part to high hunting pressures in certain areas. This is a major consideration for reserve design  
286 and conservation of these savanna suites of mammals, and the effects of assemblage disruption  
287 and community shifts are evident. Feeley (2003), in a study of avian assemblages on islands  
288 resulting from establishment of a large reservoir, pointed out that community structure is an  
289 important consideration in reserve design. More recently, studies in savanna systems have shown  
290 that the removal of large herbivores can cause unexpected trophic cascades, down to the level of  
291 complex feedbacks on ant-plant interactions (Pringle et al. 2007, Palmer et al. 2008, Estes et al.  
292 2011).

293 Current distribution patterns of herbivores on landscapes may result from currently  
294 absent or extinct competitors that once shaped the context for current species. This concept, the  
295 “ghost of competition” (Connell 1980), is complicated to address, even with the luxury of this  
296 type of long term data. In this study, we assume that patterns reflect interactions within the  
297 complement of species over a period of thirteen years. Codron et al. (2008) asked whether large-  
298 scale climatic factors or niche specialization may have shaped the assemblage of savanna species  
299 over much longer timescales (the Quaternary Land Mammal Ages), and found that adaptation  
300 through diet specialization (grazing and browsing) appears to continue through recent evolution,  
301 and may be plastic throughout evolutionary history.

302 These census data do not represent a complete inventory of Kruger National Park. In  
303 particular, the carnivore suite suffers not only from detection issues, but also omission of several  
304 smaller carnivores. With more detailed carnivore behavioral data, we would be able to explore

305 potential facilitative mechanisms which have been suggested for other systems, such as smaller  
306 carnivores (hyenas, jackals, etc.) benefiting from behaving as scavengers at larger carnivore  
307 (lion, leopard, e.g.) kills (Grange and Duncan 2006). In addition, there were population declines  
308 in several of the herbivore species during this time span, attributed in part to high rates of lion  
309 predation (Ogutu and Owen-Smith 2003, Owen-Smith et al. 2005). How this might have affected  
310 the data is unclear; we found no changes in potential structuring mechanisms within the  
311 herbivores.

312

313

314 **Acknowledgments**

315 This work was supported by a Santa Fe Institute Postdoctoral Fellowship and Gordon and Betty  
316 Moore Foundation Grant (J.L.), and in part by an NSF Biological Informatics Fellowship (S.J.R.)  
317 and funding from the National Center for Ecological Analysis and Synthesis, a Center funded by  
318 NSF (Grant EF-0553768), the University of California, Santa Barbara, and the State of  
319 California. The authors thank Scientific Services at Kruger National Park for all their support  
320 and data access, and we thank AW and EW for comments and edits.

321



322 **References**

- 323 Arsenault, R., and N. Owen-Smith. 2002. Facilitation versus competition in grazing herbivore  
324 assemblages. *Oikos* 97:313–318.
- 325 Bailey, D. W., J. E. Gross, E. A. Laca, L. R. Rittenhouse, M. B. Coughenour, D. M. Swift, and P.  
326 L. Sims. 1996. Mechanisms that result in large herbivore grazing distribution patterns.  
327 *Journal of Range Management* 49:386–400.
- 328 de Boer, W. F., and H. H. T. Prins. 1990. Large herbivores that strive mightily but eat and drink  
329 as friends. *Oecologia* 82:264–274.
- 330 Codron, D., J. S. Brink, L. Rossouw, and M. Clauss. 2008. The evolution of ecological  
331 specialization in southern African ungulates: competition- or physical environmental  
332 turnover? *Oikos* 117:344–353.
- 333 Connell, J. H. 1980. Diversity and the co-evolution of competitors, or the ghost of competition  
334 past. *Oikos* 35:131–138.
- 335 Connor, E. F., and D. Simberloff. 1979. The Assembly of Species Communities - Chance or  
336 Competition. *Ecology* 60:1132–1140.
- 337 Diamond, J. M. 1975. Assembly of Species Communities. Pages 342–444 in J. . Diamond and  
338 M. . Cody, editors. *Ecology and Evolution of Communities*. Harvard University Press,  
339 Cambridge, MA.
- 340 Durant, S. M. 1998. Competition refuges and coexistence: an example from Serengeti  
341 carnivores. *Journal of Animal Ecology* 67:370–386.
- 342 Estes, J. A., J. Terborgh, J. S. Brashares, M. E. Power, J. Berger, W. J. Bond, S. R. Carpenter, T.  
343 E. Essington, R. D. Holt, J. B. C. Jackson, R. J. Marquis, L. Oksanen, T. Oksanen, R. T.  
344 Paine, E. K. Pickett, W. J. Ripple, S. A. Sandin, M. Scheffer, T. W. Schoener, J. B.

- 345 Shurin, A. R. E. Sinclair, M. E. Soulé, R. Virtanen, and D. A. Wardle. 2011. Trophic  
346 Downgrading of Planet Earth. *Science* 333:301–306.
- 347 Estes, R. D. 1991. The behavior guide to Africa mammals: including hoofed mammals,  
348 carnivores, primates. University of California Press, London.
- 349 Farnsworth, K. D., S. Focardi, and J. A. Beecham. 2002. Grassland and herbivore interactions:  
350 how do grazers coexist? *The American Naturalist* 159:24–39.
- 351 Feeley, K. 2003. Analysis of avian communities in Lake Guri, Venezuela, using multiple  
352 assembly rule models. *Oecologia* 137:113.
- 353 Fritz, H. 1997. Low Ungulate Biomass in West African Savannas: Primary Production or  
354 Missing Megaherbivores or Large Predator Species? *Ecography* 20:421.
- 355 Gertenbach, W. P. 1980. Rainfall Patterns in the Kruger National Park. *Koedoe* 23:35–43.
- 356 Gertenbach, W. P. 1983. Landscapes of Kruger National Park. *Koedoe* 26:9–121.
- 357 Gotelli, N. J. 2000. Null model analysis of species co-occurrence patterns. *Ecology* 81:2606–  
358 2621.
- 359 Gotelli, N. J., and A. M. Ellison. 2002. Assembly rules for new England ant assemblages. *Oikos*  
360 99:591–599.
- 361 Gotelli, N. J., and D. J. McCabe. 2002. Species co-occurrence: A meta-analysis of J. M.  
362 Diamond’s assembly rules model. *Ecology* 83:2091–2096.
- 363 Grange, S., and P. Duncan. 2006. Bottom-up and top-down processes in African ungulate  
364 communities: resources and predation acting on the relative abundance of zebra and  
365 grazing bovids. *Ecography* 29:899–907.
- 366 Ladau, J., and S. Schwager. 2008. Robust hypothesis tests for independence in community  
367 assembly. *Journal of Mathematical Biology* 57:555.

- 368 Linnell, J. D. ., and O. Strand. 2000. Interference interactions, co-existence and conservation of  
369 mammalian carnivores. *Diversity and Distributions* 6:169–176.
- 370 Manly, B. F. J. 1995. A Note on the Analysis of Species Cooccurrences. *Ecology* 76:1109–1115.
- 371 Ogutu, J. O., and N. Owen-Smith. 2003. ENSO, rainfall and temperature influences on extreme  
372 population declines among African savanna ungulates. *Ecology Letters* 6:412–419.
- 373 Owen-Smith, N., D. R. Mason, and J. O. Ogutu. 2005. Correlates of survival rates for 10 African  
374 ungulate populations: density, rainfall and predation. *Journal of Animal Ecology* 74:788.
- 375 Palmer, T. M., M. L. Stanton, T. P. Young, J. R. Goheen, R. M. Pringle, and R. Karban. 2008.  
376 Breakdown of an Ant-Plant Mutualism Follows the Loss of Large Herbivores from an  
377 African Savanna. *Science* 319:192–195.
- 378 Pringle, R. M., T. P. Young, D. I. Rubenstein, and D. J. McCauley. 2007. Herbivore-initiated  
379 interaction cascades and their modulation by productivity in an African savanna.  
380 *Proceedings of the National Academy of Sciences* 104:193–197.
- 381 Radloff, F. G. T., and J. T. D. Toit. 2004. Large predators and their prey in a southern African  
382 savanna: a predator’s size determines its prey size range. *Journal of Animal Ecology*  
383 73:410–423.
- 384 Redfern, J. V., and W. M. Getz. 2002. Limiting factor mitigation: evaluating determinants of  
385 herbivore distribution in an African savanna. Not published:1–23.
- 386 Redfern, J. V., S. J. Ryan, and W. M. Getz. 2006. Defining herbivore assemblages in the Kruger  
387 National Park: a correlative coherence approach. *Oecologia* 146:632–640.
- 388 Roxburgh, S. H., and M. Matsuki. 1999. The statistical validation of null models used in spatial  
389 association analyses. *Oikos* 85:68–78.

- 390 Schluter, D. 1984. A Variance Test for Detecting Species Associations, with Some Example  
391 Applications. *Ecology* 65:998–1005.
- 392 Schmitz, O. J. 2007. Predator diversity and trophic interactions. *Ecology* 88:2415–2426.
- 393 Schoener, T. W. 1983. Field Experiments on Interspecific Competition. *American Naturalist*  
394 122:240–285.
- 395 Senft, R. L. 1989. Hierarchical Foraging Models - Effects of Stocking and Landscape  
396 Composition on Simulated Resource Use by Cattle. *Ecological Modelling* 46:283–303.
- 397 Senft, R. L., M. B. Coughenour, D. W. Bailey, L. R. Rittenhouse, O. E. Sala, and D. M. Swift.  
398 1987. Large Herbivore Foraging and Ecological Hierarchies. *Bioscience* 37:789-.
- 399 Sfenthourakis, S., E. Tzanatos, and S. Giokas. 2006. Species co-occurrence: the case of  
400 congeneric species and a causal approach to patterns of species association. *Global*  
401 *Ecology and Biogeography* 15:39–49.
- 402 Stone, L., and A. Roberts. 1990. The Checkerboard Score and Species Distributions. *Oecologia*  
403 85:74–79.
- 404 Ulrich, W., F. Jabot, and N. J. Gotelli. 2017. Competitive interactions change the pattern of  
405 species co-occurrences under neutral dispersal. *Oikos* 126:91–100.
- 406 Viljoen, P. 1996a. Ecological aerial survey monitoring programme in the Kruger National Park;  
407 Data Catalogue. National Parks Board, Republic of South Africa, Skukuza.
- 408 Viljoen, P. C. 1996b. Ecological aerial surveys (EAS) in the Kruger National Park. Summary of  
409 current methodology - 1996 update. Unpublished, National Parks Board, Republic of  
410 South Africa, Skukuza.

411

412

413 **Figures and Tables**

414 Figure 1: Location of Kruger National Park in Africa, with inset showing the four quadrants (NE,  
415 NW, SE, SW) created by the East-West granitic-basaltic landscape split, and the North-South  
416 division as a proxy for rain gradient, and a far northern, uncensused (U) region of the park.

417

418 Table 1: Mammal species observed in the EAS census data and used in the study

419

420 Table 2: Species divisions into guilds as specified in hypotheses H1-H4.

421

422 Table 3: Summary results of the robust test, by mechanism (H1-H4) and resolution; number of  
423 years are given in their  $p$ -value ranges

424

425 Supplemental Table 1: Full results for the statistical tests, by hypothesis H1-H4

426

427

428 **Figure 1**

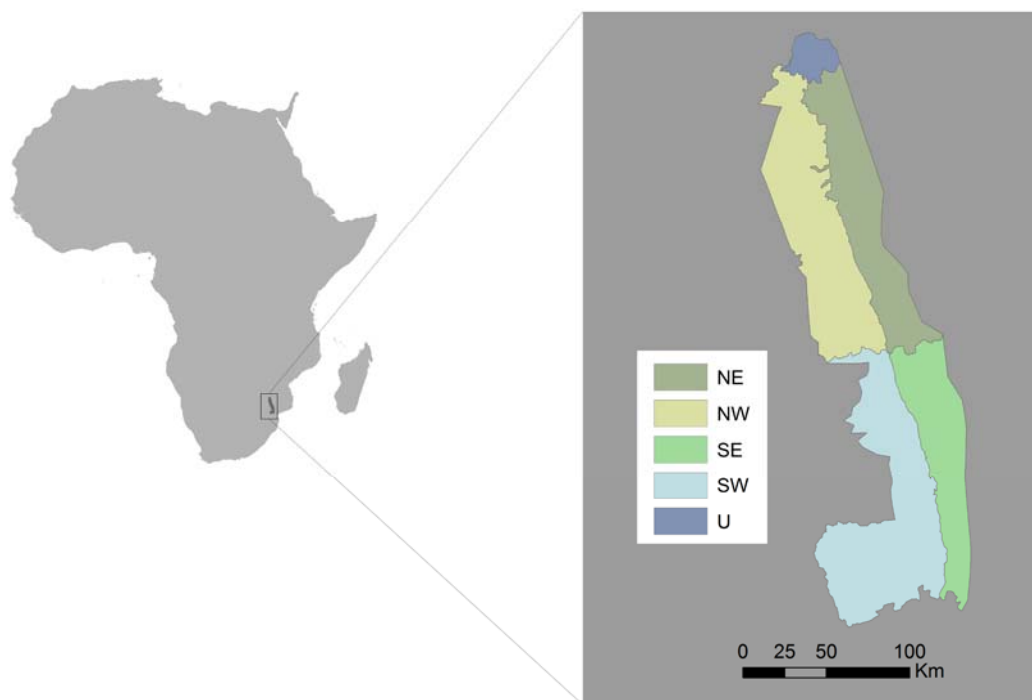

429

430

431 **Table 1**

| <i>Order</i>            | <i>Family</i>  | <i>Species</i>                   | <i>Common Name</i>        |                               |         |
|-------------------------|----------------|----------------------------------|---------------------------|-------------------------------|---------|
| Artiodactyla            | Bovidae        | <i>Aepyceris melampus</i>        | Impala                    |                               |         |
|                         |                | <i>Connochaetes taurinus</i>     | Blue Wildebeest           |                               |         |
|                         |                | <i>Damaliscus lunatus</i>        | Tsessebe                  |                               |         |
|                         |                | <i>Hippotragus equinus</i>       | Roan Antelope             |                               |         |
|                         |                | <i>Hippotragus niger</i>         | Sable Antelope            |                               |         |
|                         |                | <i>Kobus ellipsiprymnus</i>      | Waterbuck                 |                               |         |
|                         |                | <i>Oreotragus oreotragus</i>     | Klipspringer              |                               |         |
|                         |                | <i>Ourebia ourebi</i>            | Oribi                     |                               |         |
|                         |                | <i>Raphicerus campestris</i>     | Steenbuck                 |                               |         |
|                         |                | <i>Redunca arundinum</i>         | Reedbuck                  |                               |         |
|                         |                | <i>Sigmoceros lichtensteinii</i> | Lichtenstein's Hartebeest |                               |         |
|                         |                | <i>Syncerus caffer</i>           | Buffalo                   |                               |         |
|                         |                | <i>Sylvicapra grimmia</i>        | Duiker                    |                               |         |
|                         |                | <i>Taurotragus oryx</i>          | Eland                     |                               |         |
|                         |                | <i>Tragelaphus angasii</i>       | Nyala                     |                               |         |
|                         |                | <i>Tragelaphus scriptus</i>      | Bushbuck                  |                               |         |
|                         |                | <i>Tragelaphus strepsiceros</i>  | Kudu                      |                               |         |
|                         |                |                                  | Giraffidae                | <i>Giraffa camelopardalis</i> | Giraffe |
|                         |                |                                  | Hippopotamidae            | <i>Hippopotamus amphibius</i> | Hippo   |
|                         | Suidae         | <i>Phacochoerus africanus</i>    | Warthog                   |                               |         |
|                         |                | <i>Potamochoerus larvatus</i>    | Bushpig                   |                               |         |
| Perissodactyla          | Equidae        | <i>Equus quagga</i>              | Zebra                     |                               |         |
|                         | Rhinocerotidae | <i>Ceratotherium simium</i>      | White Rhino               |                               |         |
| <i>Diceros bicornis</i> |                | Black Rhino                      |                           |                               |         |
|                         |                |                                  |                           |                               |         |
| Proboscidea             | Elephantidae   | <i>Loxodonta africana</i>        | Elephant                  |                               |         |
| Carnivora               | Canidae        | <i>Canis mesomelas</i>           | Black-Backed Jackal       |                               |         |
|                         |                | <i>Lycaon pictus</i>             | Wild Dog                  |                               |         |
|                         | Felidae        | <i>Acinonyx jubatus</i>          | Cheetah                   |                               |         |
|                         |                | <i>Panthera leo</i>              | Lion                      |                               |         |
|                         |                | <i>Panthera pardus</i>           | Leopard                   |                               |         |
|                         | Hyaenidae      | <i>Crocuta crocuta</i>           | Hyaena                    |                               |         |
|                         | Mustelidae     | <i>Mellivora capensis</i>        | Honey Badger              |                               |         |

432

433

434 **Table 2**

| <i>Hypothesis</i> | <i>Guild divisions and species (common names)</i>                                                                                                                                                                                                                      |                                                                                                                                                                                                                                                                                                                      |
|-------------------|------------------------------------------------------------------------------------------------------------------------------------------------------------------------------------------------------------------------------------------------------------------------|----------------------------------------------------------------------------------------------------------------------------------------------------------------------------------------------------------------------------------------------------------------------------------------------------------------------|
| <b>H1</b>         | <b>Carnivores:</b><br>Black-Backed Jackal, Wild dog,<br>Cheetah, Lion, Leopard, Hyaena,<br>Honey Badger                                                                                                                                                                | <b>Herbivores:</b><br>Impala, Blue Wildebeest, Tsessebe, Roan<br>Antelope, Sable Antelope, Waterbuck,<br>Klipspringer, Oribi, Steenbuck, Reedbuck,<br>Lichtenstein's Hartebeest, Buffalo, Duiker,<br>Eland, Nyala, Bushbuck, Kudu, Giraffe,<br>Hippo, Warthog, Bushpig, Zebra, White<br>Rhino, Black Rhino, Elephant |
| <b>H2</b>         | <b>Ruminants:</b><br>Roan Antelope Bull, Buffalo,<br>Bushbuck, Duiker, Eland, Kudu,<br>Giraffe, Klipspringer,<br>Lichtenstein's Hartebeest, Nyala,<br>Oribi, Impala, Roan Antelope,<br>Reedbuck, Sable Antelope,<br>Steenbuck, Tsessebe, Blue<br>Wildebeest, Waterbuck | <b>Non-Ruminants:</b><br>Bushpig, Hippo, Zebra, Elephant, Black<br>Rhino, Warthog, White Rhino                                                                                                                                                                                                                       |
| <b>H3</b>         | <b>Grazers:</b><br>Buffalo, Zebra, Wildebeest                                                                                                                                                                                                                          | <b>Browsers:</b><br>Elephant, Giraffe, Kudu, Impala                                                                                                                                                                                                                                                                  |
| <b>H4</b>         | <b>Grazers:</b><br><i>Small</i><br>Zebra, Wildebeest<br><i>Large</i><br>Buffalo                                                                                                                                                                                        | <b>Browsers:</b><br><i>Small</i><br>Giraffe, Kudu, Impala<br><i>Large</i><br>Elephant                                                                                                                                                                                                                                |

435

436



437 **Table 3**

438

| <i>Mechanism</i> | <i>Spatial Resolution</i> | <i>p &lt; 0.05</i> | <i>0.05 ≤ p ≤ 0.95</i> | <i>p &gt; 0.95</i> |
|------------------|---------------------------|--------------------|------------------------|--------------------|
| H1               | 1km                       | 2                  | 5                      | 6                  |
|                  | 5 km                      | 13                 | --                     | --                 |
|                  | 10 km                     | 13                 | --                     | --                 |
|                  | 15 km                     | 8                  | 5                      | --                 |
| H2               | 1km                       | --                 | --                     | 13                 |
|                  | 5 km                      | --                 | --                     | 13                 |
|                  | 10 km                     | --                 | --                     | 13                 |
|                  | 15 km                     | --                 | --                     | 13                 |
| H3               | 1km                       | 12                 | 1                      | --                 |
|                  | 5 km                      | 13                 | --                     | --                 |
|                  | 10 km                     | 13                 | --                     | --                 |
|                  | 15 km                     | 13                 | --                     | --                 |
| H4               | 1km                       | 9                  | 4                      | --                 |
|                  | 5 km                      | 8                  | 3                      | 2                  |
|                  | 10 km                     | 13                 | --                     | --                 |
|                  | 15 km                     | 13                 | --                     | --                 |

439 **Supp 1.**

| <b>H1</b>    |             | <b>One-tailed test</b> |             |                      |                      | <b>Two-tailed test</b> |             |                      |                      |             |             |
|--------------|-------------|------------------------|-------------|----------------------|----------------------|------------------------|-------------|----------------------|----------------------|-------------|-------------|
| <b>Scale</b> | <b>Year</b> | <b>P-value</b>         | <b>Size</b> | <b>Minimum Power</b> | <b>Maximum Power</b> | <b>P-value</b>         | <b>Size</b> | <b>Minimum Power</b> | <b>Maximum Power</b> | <b>Rows</b> | <b>Cols</b> |
| 1km          | 1981        | 0.08                   | 0.04        | 0.07                 | 0.22                 | 0.15                   | 0.05        | 0.04                 | 1.00                 | 32          | 3377        |
|              | 1982        | 0.00                   | 0.04        | 0.07                 | 0.31                 | 0.00                   | 0.05        | 0.05                 | 1.00                 | 32          | 3347        |
|              | 1983        | 0.06                   | 0.05        | 0.06                 | 0.22                 | 0.12                   | 0.04        | 0.04                 | 1.00                 | 34          | 3366        |
|              | 1984        | 0.00                   | 0.04        | 0.07                 | 0.26                 | 0.00                   | 0.05        | 0.05                 | 1.00                 | 33          | 3390        |
|              | 1985        | 0.12                   | 0.01        | 0.00                 | 0.00                 | 0.23                   | 0.05        | 0.00                 | 0.29                 | 35          | 12402       |
|              | 1986        | 1.00                   | 0.00        | 0.00                 | 0.00                 | 1.00                   | 0.00        | 0.00                 | 0.00                 | 36          | 12234       |
|              | 1987        | 1.00                   | 0.00        | 0.00                 | 0.00                 | 1.00                   | 0.00        | 0.00                 | 0.00                 | 36          | 12493       |
|              | 1988        | 0.16                   | 0.00        | 0.00                 | 0.00                 | 0.32                   | 0.05        | 0.00                 | 0.30                 | 35          | 12351       |
|              | 1989        | 1.00                   | 0.00        | 0.00                 | 0.00                 | 1.00                   | 0.00        | 0.00                 | 0.00                 | 35          | 11718       |
|              | 1990        | 1.00                   | 0.00        | 0.00                 | 0.00                 | 1.00                   | 0.00        | 0.00                 | 0.00                 | 34          | 11905       |
|              | 1991        | 0.12                   | 0.00        | 0.00                 | 0.00                 | 0.25                   | 0.00        | 0.00                 | 0.00                 | 36          | 11330       |
|              | 1992        | 1.00                   | 0.00        | 0.00                 | 0.00                 | 1.00                   | 0.00        | 0.00                 | 0.00                 | 36          | 11811       |
|              | 1993        | 1.00                   | 0.00        | 0.00                 | 0.00                 | 1.00                   | 0.00        | 0.00                 | 0.00                 | 36          | 10772       |
| 5km          | 1981        | 0.00                   | 0.04        | 0.12                 | 0.61                 | 0.00                   | 0.05        | 0.05                 | 1.00                 | 31          | 604         |
|              | 1982        | 0.00                   | 0.04        | 0.14                 | 0.78                 | 0.00                   | 0.05        | 0.05                 | 1.00                 | 32          | 605         |
|              | 1983        | 0.00                   | 0.04        | 0.13                 | 0.77                 | 0.00                   | 0.05        | 0.05                 | 1.00                 | 34          | 605         |
|              | 1984        | 0.00                   | 0.05        | 0.16                 | 0.83                 | 0.00                   | 0.05        | 0.05                 | 1.00                 | 32          | 604         |
|              | 1985        | 0.00                   | 0.04        | 0.16                 | 0.85                 | 0.00                   | 0.05        | 0.05                 | 1.00                 | 34          | 617         |
|              | 1986        | 0.00                   | 0.04        | 0.13                 | 0.73                 | 0.00                   | 0.05        | 0.05                 | 1.00                 | 36          | 607         |
|              | 1987        | 0.00                   | 0.04        | 0.13                 | 0.75                 | 0.00                   | 0.06        | 0.06                 | 1.00                 | 35          | 617         |
|              | 1988        | 0.00                   | 0.05        | 0.12                 | 0.66                 | 0.00                   | 0.05        | 0.05                 | 1.00                 | 35          | 619         |
|              | 1989        | 0.00                   | 0.04        | 0.11                 | 0.53                 | 0.00                   | 0.05        | 0.05                 | 1.00                 | 35          | 620         |
|              | 1990        | 0.00                   | 0.04        | 0.13                 | 0.71                 | 0.00                   | 0.05        | 0.05                 | 1.00                 | 34          | 611         |
|              | 1991        | 0.01                   | 0.04        | 0.09                 | 0.46                 | 0.02                   | 0.05        | 0.05                 | 1.00                 | 36          | 620         |
|              | 1992        | 0.00                   | 0.04        | 0.09                 | 0.37                 | 0.00                   | 0.05        | 0.05                 | 1.00                 | 35          | 621         |
|              | 1993        | 0.01                   | 0.03        | 0.06                 | 0.18                 | 0.02                   | 0.05        | 0.01                 | 1.00                 | 36          | 620         |

440

441

442

| <b>H1</b>    |             | <b>One-tailed test</b> |             |                      |                      | <b>Two-tailed test</b> |             |                      |                      |             |             |
|--------------|-------------|------------------------|-------------|----------------------|----------------------|------------------------|-------------|----------------------|----------------------|-------------|-------------|
| <b>Scale</b> | <b>Year</b> | <b>P-value</b>         | <b>Size</b> | <b>Minimum Power</b> | <b>Maximum Power</b> | <b>P-value</b>         | <b>Size</b> | <b>Minimum Power</b> | <b>Maximum Power</b> | <b>Rows</b> | <b>Cols</b> |
| 10km         | 1981        | 0.00                   | 0.04        | 0.13                 | 0.68                 | 0.00                   | 0.04        | 0.04                 | 1.00                 | 31          | 130         |
|              | 1982        | 0.00                   | 0.04        | 0.15                 | 0.81                 | 0.00                   | 0.05        | 0.05                 | 1.00                 | 32          | 129         |
|              | 1983        | 0.00                   | 0.04        | 0.15                 | 0.87                 | 0.00                   | 0.05        | 0.05                 | 1.00                 | 33          | 130         |
|              | 1984        | 0.00                   | 0.05        | 0.17                 | 0.88                 | 0.00                   | 0.05        | 0.05                 | 1.00                 | 32          | 130         |
|              | 1985        | 0.00                   | 0.05        | 0.16                 | 0.88                 | 0.01                   | 0.05        | 0.05                 | 1.00                 | 34          | 130         |
|              | 1986        | 0.00                   | 0.04        | 0.14                 | 0.81                 | 0.00                   | 0.05        | 0.05                 | 1.00                 | 36          | 130         |
|              | 1987        | 0.00                   | 0.04        | 0.15                 | 0.81                 | 0.00                   | 0.05        | 0.05                 | 1.00                 | 35          | 130         |
|              | 1988        | 0.00                   | 0.05        | 0.14                 | 0.74                 | 0.00                   | 0.05        | 0.05                 | 1.00                 | 35          | 130         |
|              | 1989        | 0.00                   | 0.04        | 0.13                 | 0.66                 | 0.00                   | 0.06        | 0.06                 | 1.00                 | 34          | 130         |
|              | 1990        | 0.00                   | 0.04        | 0.14                 | 0.75                 | 0.00                   | 0.05        | 0.05                 | 1.00                 | 34          | 130         |
|              | 1991        | 0.02                   | 0.04        | 0.12                 | 0.58                 | 0.03                   | 0.05        | 0.05                 | 1.00                 | 36          | 130         |
|              | 1992        | 0.00                   | 0.05        | 0.12                 | 0.60                 | 0.00                   | 0.05        | 0.05                 | 1.00                 | 35          | 130         |
|              | 1993        | 0.00                   | 0.03        | 0.08                 | 0.40                 | 0.00                   | 0.04        | 0.04                 | 1.00                 | 36          | 130         |
| 15km         | 1981        | 0.03                   | 0.04        | 0.10                 | 0.45                 | 0.07                   | 0.05        | 0.05                 | 1.00                 | 31          | 43          |
|              | 1982        | 0.00                   | 0.04        | 0.11                 | 0.56                 | 0.00                   | 0.05        | 0.05                 | 1.00                 | 32          | 43          |
|              | 1983        | 0.07                   | 0.04        | 0.13                 | 0.71                 | 0.13                   | 0.06        | 0.06                 | 1.00                 | 33          | 43          |
|              | 1984        | 0.01                   | 0.04        | 0.13                 | 0.63                 | 0.01                   | 0.05        | 0.05                 | 1.00                 | 31          | 43          |
|              | 1985        | 0.11                   | 0.04        | 0.12                 | 0.62                 | 0.21                   | 0.05        | 0.05                 | 1.00                 | 34          | 43          |
|              | 1986        | 0.14                   | 0.04        | 0.12                 | 0.61                 | 0.28                   | 0.04        | 0.04                 | 1.00                 | 36          | 43          |
|              | 1987        | 0.05                   | 0.04        | 0.12                 | 0.57                 | 0.10                   | 0.04        | 0.04                 | 1.00                 | 35          | 43          |
|              | 1988        | 0.01                   | 0.03        | 0.11                 | 0.53                 | 0.01                   | 0.05        | 0.05                 | 1.00                 | 34          | 43          |
|              | 1989        | 0.00                   | 0.04        | 0.10                 | 0.47                 | 0.01                   | 0.05        | 0.05                 | 1.00                 | 34          | 43          |
|              | 1990        | 0.00                   | 0.04        | 0.11                 | 0.48                 | 0.00                   | 0.05        | 0.05                 | 1.00                 | 34          | 43          |
|              | 1991        | 0.12                   | 0.04        | 0.09                 | 0.43                 | 0.24                   | 0.04        | 0.04                 | 1.00                 | 36          | 43          |
|              | 1992        | 0.00                   | 0.04        | 0.10                 | 0.45                 | 0.00                   | 0.05        | 0.05                 | 1.00                 | 35          | 43          |
|              | 1993        | 0.00                   | 0.04        | 0.08                 | 0.29                 | 0.00                   | 0.05        | 0.05                 | 1.00                 | 35          | 43          |

443

444

445

446

| <b>H2</b>    |             | <b>One-tailed test</b> |             |                      |                      | <b>Two-tailed test</b> |             |                      |                      |             |             |
|--------------|-------------|------------------------|-------------|----------------------|----------------------|------------------------|-------------|----------------------|----------------------|-------------|-------------|
| <b>Scale</b> | <b>Year</b> | <b>P-value</b>         | <b>Size</b> | <b>Minimum Power</b> | <b>Maximum Power</b> | <b>P-value</b>         | <b>Size</b> | <b>Minimum Power</b> | <b>Maximum Power</b> | <b>Rows</b> | <b>Cols</b> |
| 1km          | 1981        | 1.00                   | 0.05        | 0.00                 | 1.00                 | 0.00                   | 0.05        | 0.04                 | 1.00                 | 26          | 3377        |
|              | 1982        | 1.00                   | 0.05        | 0.00                 | 1.00                 | 0.00                   | 0.05        | 0.04                 | 1.00                 | 27          | 3347        |
|              | 1983        | 1.00                   | 0.05        | 0.01                 | 1.00                 | 0.00                   | 0.05        | 0.05                 | 1.00                 | 28          | 3366        |
|              | 1984        | 1.00                   | 0.06        | 0.00                 | 1.00                 | 0.00                   | 0.06        | 0.03                 | 1.00                 | 27          | 3390        |
|              | 1985        | 1.00                   | 0.06        | 0.08                 | 1.00                 | 0.00                   | 0.06        | 0.06                 | 1.00                 | 29          | 12402       |
|              | 1986        | 1.00                   | 0.05        | 0.07                 | 1.00                 | 0.00                   | 0.06        | 0.06                 | 1.00                 | 29          | 12234       |
|              | 1987        | 1.00                   | 0.07        | 0.08                 | 1.00                 | 0.00                   | 0.05        | 0.05                 | 1.00                 | 29          | 12493       |
|              | 1988        | 1.00                   | 0.05        | 0.07                 | 1.00                 | 0.00                   | 0.05        | 0.05                 | 1.00                 | 28          | 12351       |
|              | 1989        | 1.00                   | 0.05        | 0.06                 | 1.00                 | 0.00                   | 0.05        | 0.05                 | 1.00                 | 28          | 11718       |
|              | 1990        | 1.00                   | 0.05        | 0.06                 | 1.00                 | 0.00                   | 0.05        | 0.05                 | 1.00                 | 28          | 11905       |
|              | 1991        | 1.00                   | 0.06        | 0.07                 | 1.00                 | 0.00                   | 0.06        | 0.06                 | 1.00                 | 29          | 11330       |
|              | 1992        | 1.00                   | 0.05        | 0.07                 | 0.99                 | 0.00                   | 0.05        | 0.05                 | 1.00                 | 29          | 11811       |
|              | 1993        | 1.00                   | 0.05        | 0.07                 | 0.97                 | 0.00                   | 0.05        | 0.05                 | 1.00                 | 30          | 10772       |
| 5km          | 1981        | 1.00                   | 0.05        | 0.00                 | 1.00                 | 0.00                   | 0.06        | 0.06                 | 1.00                 | 26          | 604         |
|              | 1982        | 1.00                   | 0.04        | 0.00                 | 1.00                 | 0.00                   | 0.04        | 0.04                 | 1.00                 | 27          | 605         |
|              | 1983        | 1.00                   | 0.05        | 0.00                 | 1.00                 | 0.00                   | 0.06        | 0.06                 | 1.00                 | 28          | 605         |
|              | 1984        | 1.00                   | 0.05        | 0.00                 | 1.00                 | 0.00                   | 0.05        | 0.05                 | 1.00                 | 27          | 604         |
|              | 1985        | 1.00                   | 0.04        | 0.00                 | 1.00                 | 0.00                   | 0.05        | 0.05                 | 1.00                 | 29          | 617         |
|              | 1986        | 1.00                   | 0.05        | 0.00                 | 1.00                 | 0.00                   | 0.05        | 0.05                 | 1.00                 | 29          | 607         |
|              | 1987        | 1.00                   | 0.05        | 0.00                 | 1.00                 | 0.00                   | 0.05        | 0.05                 | 1.00                 | 29          | 617         |
|              | 1988        | 1.00                   | 0.05        | 0.00                 | 1.00                 | 0.00                   | 0.05        | 0.05                 | 1.00                 | 28          | 619         |
|              | 1989        | 1.00                   | 0.06        | 0.00                 | 1.00                 | 0.00                   | 0.06        | 0.06                 | 1.00                 | 28          | 620         |
|              | 1990        | 1.00                   | 0.06        | 0.00                 | 1.00                 | 0.00                   | 0.06        | 0.06                 | 1.00                 | 28          | 611         |
|              | 1991        | 1.00                   | 0.05        | 0.00                 | 1.00                 | 0.00                   | 0.05        | 0.05                 | 1.00                 | 29          | 620         |
|              | 1992        | 1.00                   | 0.05        | 0.00                 | 1.00                 | 0.00                   | 0.05        | 0.05                 | 1.00                 | 29          | 621         |
|              | 1993        | 1.00                   | 0.05        | 0.00                 | 1.00                 | 0.00                   | 0.05        | 0.05                 | 1.00                 | 30          | 620         |

447

448

449

| <b>H2</b>    |             | <b>One-tailed test</b> |             |                      |                      | <b>Two-tailed test</b> |             |                      |                      |             |             |
|--------------|-------------|------------------------|-------------|----------------------|----------------------|------------------------|-------------|----------------------|----------------------|-------------|-------------|
| <b>Scale</b> | <b>Year</b> | <b>P-value</b>         | <b>Size</b> | <b>Minimum Power</b> | <b>Maximum Power</b> | <b>P-value</b>         | <b>Size</b> | <b>Minimum Power</b> | <b>Maximum Power</b> | <b>Rows</b> | <b>Cols</b> |
|              | 1982        | 1.00                   | 0.04        | 0.00                 | 1.00                 | 0.00                   | 0.05        | 0.04                 | 1.00                 | 27          | 129         |
|              | 1983        | 1.00                   | 0.04        | 0.00                 | 1.00                 | 0.00                   | 0.05        | 0.02                 | 1.00                 | 28          | 130         |
|              | 1984        | 1.00                   | 0.04        | 0.00                 | 1.00                 | 0.00                   | 0.05        | 0.05                 | 1.00                 | 27          | 130         |
|              | 1985        | 1.00                   | 0.04        | 0.00                 | 1.00                 | 0.00                   | 0.05        | 0.04                 | 1.00                 | 29          | 130         |
|              | 1986        | 1.00                   | 0.05        | 0.00                 | 1.00                 | 0.00                   | 0.05        | 0.03                 | 1.00                 | 29          | 130         |
|              | 1987        | 1.00                   | 0.05        | 0.00                 | 1.00                 | 0.00                   | 0.05        | 0.02                 | 1.00                 | 29          | 130         |
|              | 1988        | 1.00                   | 0.05        | 0.00                 | 1.00                 | 0.00                   | 0.06        | 0.02                 | 1.00                 | 28          | 130         |
|              | 1989        | 1.00                   | 0.04        | 0.00                 | 1.00                 | 0.00                   | 0.04        | 0.02                 | 1.00                 | 28          | 130         |
|              | 1990        | 1.00                   | 0.04        | 0.00                 | 1.00                 | 0.00                   | 0.05        | 0.03                 | 1.00                 | 28          | 130         |
|              | 1991        | 1.00                   | 0.05        | 0.00                 | 1.00                 | 0.00                   | 0.05        | 0.01                 | 1.00                 | 29          | 130         |
|              | 1992        | 1.00                   | 0.05        | 0.00                 | 1.00                 | 0.00                   | 0.05        | 0.01                 | 1.00                 | 29          | 130         |
|              | 1993        | 1.00                   | 0.05        | 0.00                 | 1.00                 | 0.00                   | 0.06        | 0.02                 | 1.00                 | 30          | 130         |
|              |             |                        |             |                      |                      |                        |             |                      |                      |             |             |
| 15km         | 1981        | 1.00                   | 0.04        | 0.00                 | 1.00                 | 0.00                   | 0.05        | 0.02                 | 1.00                 | 26          | 43          |
|              | 1982        | 1.00                   | 0.03        | 0.00                 | 1.00                 | 0.00                   | 0.05        | 0.02                 | 1.00                 | 27          | 43          |
|              | 1983        | 1.00                   | 0.03        | 0.00                 | 1.00                 | 0.00                   | 0.05        | 0.03                 | 1.00                 | 28          | 43          |
|              | 1984        | 1.00                   | 0.03        | 0.00                 | 1.00                 | 0.00                   | 0.04        | 0.02                 | 1.00                 | 27          | 43          |
|              | 1985        | 1.00                   | 0.04        | 0.00                 | 1.00                 | 0.00                   | 0.05        | 0.03                 | 1.00                 | 29          | 43          |
|              | 1986        | 1.00                   | 0.04        | 0.00                 | 1.00                 | 0.00                   | 0.05        | 0.02                 | 1.00                 | 29          | 43          |
|              | 1987        | 1.00                   | 0.04        | 0.00                 | 1.00                 | 0.00                   | 0.05        | 0.02                 | 1.00                 | 29          | 43          |
|              | 1988        | 1.00                   | 0.04        | 0.00                 | 1.00                 | 0.00                   | 0.05        | 0.02                 | 1.00                 | 28          | 43          |
|              | 1989        | 1.00                   | 0.04        | 0.00                 | 1.00                 | 0.00                   | 0.04        | 0.02                 | 1.00                 | 28          | 43          |
|              | 1990        | 1.00                   | 0.04        | 0.00                 | 1.00                 | 0.00                   | 0.05        | 0.02                 | 1.00                 | 28          | 43          |
|              | 1991        | 1.00                   | 0.04        | 0.00                 | 1.00                 | 0.00                   | 0.05        | 0.02                 | 1.00                 | 29          | 43          |
|              | 1992        | 1.00                   | 0.04        | 0.00                 | 1.00                 | 0.00                   | 0.05        | 0.02                 | 1.00                 | 29          | 43          |
|              | 1993        | 1.00                   | 0.04        | 0.00                 | 1.00                 | 0.00                   | 0.04        | 0.02                 | 1.00                 | 29          | 43          |

450

451

| <b>H3</b>    |             | <b>One-tailed test</b> |             |                      |                      | <b>Two-tailed test</b> |             |                      |                      |             |             |
|--------------|-------------|------------------------|-------------|----------------------|----------------------|------------------------|-------------|----------------------|----------------------|-------------|-------------|
| <b>Scale</b> | <b>Year</b> | <b>P-value</b>         | <b>Size</b> | <b>Minimum Power</b> | <b>Maximum Power</b> | <b>P-value</b>         | <b>Size</b> | <b>Minimum Power</b> | <b>Maximum Power</b> | <b>Rows</b> | <b>Cols</b> |
| 1km          | 1981        | 0.00                   | 0.05        | 0.04                 | 1.00                 | 0.00                   | 0.05        | 0.05                 | 1.00                 | 11          | 3377        |
|              | 1982        | 0.00                   | 0.05        | 0.04                 | 1.00                 | 0.00                   | 0.05        | 0.05                 | 1.00                 | 11          | 3347        |
|              | 1983        | 0.00                   | 0.04        | 0.05                 | 1.00                 | 0.00                   | 0.04        | 0.04                 | 1.00                 | 11          | 3366        |
|              | 1984        | 0.00                   | 0.05        | 0.04                 | 1.00                 | 0.00                   | 0.05        | 0.05                 | 1.00                 | 11          | 3390        |
|              | 1985        | 0.00                   | 0.05        | 0.07                 | 0.98                 | 0.01                   | 0.05        | 0.05                 | 1.00                 | 11          | 12402       |
|              | 1986        | 0.00                   | 0.05        | 0.07                 | 0.89                 | 0.00                   | 0.05        | 0.05                 | 0.98                 | 11          | 12234       |
|              | 1987        | 0.00                   | 0.05        | 0.07                 | 0.90                 | 0.00                   | 0.05        | 0.05                 | 0.99                 | 11          | 12493       |
|              | 1988        | 0.00                   | 0.06        | 0.07                 | 0.96                 | 0.00                   | 0.05        | 0.05                 | 1.00                 | 11          | 12351       |
|              | 1989        | 0.01                   | 0.05        | 0.06                 | 0.87                 | 0.02                   | 0.05        | 0.04                 | 0.97                 | 11          | 11718       |
|              | 1990        | 0.01                   | 0.05        | 0.07                 | 0.91                 | 0.02                   | 0.05        | 0.05                 | 0.99                 | 11          | 11905       |
|              | 1991        | 0.05                   | 0.05        | 0.07                 | 0.86                 | 0.10                   | 0.06        | 0.05                 | 0.97                 | 11          | 11330       |
|              | 1992        | 0.00                   | 0.05        | 0.07                 | 0.83                 | 0.00                   | 0.05        | 0.05                 | 0.96                 | 11          | 11811       |
|              | 1993        | 0.00                   | 0.05        | 0.07                 | 0.75                 | 0.00                   | 0.05        | 0.05                 | 0.91                 | 11          | 10772       |
| 5km          | 1981        | 0.00                   | 0.05        | 0.00                 | 1.00                 | 0.00                   | 0.05        | 0.05                 | 1.00                 | 11          | 604         |
|              | 1982        | 0.00                   | 0.05        | 0.00                 | 1.00                 | 0.00                   | 0.05        | 0.05                 | 1.00                 | 11          | 605         |
|              | 1983        | 0.00                   | 0.05        | 0.00                 | 1.00                 | 0.00                   | 0.05        | 0.05                 | 1.00                 | 11          | 605         |
|              | 1984        | 0.00                   | 0.05        | 0.00                 | 1.00                 | 0.00                   | 0.05        | 0.05                 | 1.00                 | 11          | 604         |
|              | 1985        | 0.00                   | 0.05        | 0.00                 | 1.00                 | 0.00                   | 0.05        | 0.05                 | 1.00                 | 11          | 617         |
|              | 1986        | 0.00                   | 0.05        | 0.00                 | 1.00                 | 0.00                   | 0.05        | 0.05                 | 1.00                 | 11          | 607         |
|              | 1987        | 0.00                   | 0.04        | 0.00                 | 1.00                 | 0.00                   | 0.05        | 0.05                 | 1.00                 | 11          | 617         |
|              | 1988        | 0.00                   | 0.05        | 0.00                 | 1.00                 | 0.00                   | 0.05        | 0.05                 | 1.00                 | 11          | 619         |
|              | 1989        | 0.00                   | 0.05        | 0.00                 | 1.00                 | 0.00                   | 0.05        | 0.05                 | 1.00                 | 11          | 620         |
|              | 1990        | 0.00                   | 0.04        | 0.00                 | 1.00                 | 0.00                   | 0.05        | 0.05                 | 1.00                 | 11          | 611         |
|              | 1991        | 0.00                   | 0.05        | 0.00                 | 1.00                 | 0.00                   | 0.05        | 0.05                 | 1.00                 | 11          | 620         |
|              | 1992        | 0.00                   | 0.05        | 0.00                 | 1.00                 | 0.00                   | 0.05        | 0.05                 | 1.00                 | 11          | 621         |
|              | 1993        | 0.00                   | 0.05        | 0.01                 | 1.00                 | 0.00                   | 0.05        | 0.05                 | 1.00                 | 11          | 620         |

452

453

454

| <b>H3</b>    |             | <b>One-tailed test</b> |             |                      |                      | <b>Two-tailed test</b> |             |                      |                      |             |             |
|--------------|-------------|------------------------|-------------|----------------------|----------------------|------------------------|-------------|----------------------|----------------------|-------------|-------------|
| <b>Scale</b> | <b>Year</b> | <b>P-value</b>         | <b>Size</b> | <b>Minimum Power</b> | <b>Maximum Power</b> | <b>P-value</b>         | <b>Size</b> | <b>Minimum Power</b> | <b>Maximum Power</b> | <b>Rows</b> | <b>Cols</b> |
|              | 1982        | 0.00                   | 0.04        | 0.00                 | 1.00                 | 0.00                   | 0.05        | 0.05                 | 1.00                 | 11          | 129         |
|              | 1983        | 0.00                   | 0.04        | 0.00                 | 1.00                 | 0.00                   | 0.05        | 0.05                 | 1.00                 | 11          | 130         |
|              | 1984        | 0.00                   | 0.05        | 0.00                 | 1.00                 | 0.00                   | 0.05        | 0.05                 | 1.00                 | 11          | 130         |
|              | 1985        | 0.00                   | 0.04        | 0.00                 | 1.00                 | 0.00                   | 0.04        | 0.04                 | 1.00                 | 11          | 130         |
|              | 1986        | 0.00                   | 0.05        | 0.00                 | 1.00                 | 0.00                   | 0.05        | 0.05                 | 1.00                 | 11          | 130         |
|              | 1987        | 0.00                   | 0.05        | 0.00                 | 1.00                 | 0.00                   | 0.05        | 0.05                 | 1.00                 | 11          | 130         |
|              | 1988        | 0.00                   | 0.05        | 0.00                 | 1.00                 | 0.00                   | 0.05        | 0.05                 | 1.00                 | 11          | 130         |
|              | 1989        | 0.00                   | 0.05        | 0.00                 | 1.00                 | 0.00                   | 0.05        | 0.05                 | 1.00                 | 11          | 130         |
|              | 1990        | 0.00                   | 0.04        | 0.00                 | 1.00                 | 0.00                   | 0.05        | 0.05                 | 1.00                 | 11          | 130         |
|              | 1991        | 0.00                   | 0.05        | 0.00                 | 1.00                 | 0.00                   | 0.05        | 0.05                 | 1.00                 | 11          | 130         |
|              | 1992        | 0.00                   | 0.05        | 0.00                 | 1.00                 | 0.00                   | 0.05        | 0.05                 | 1.00                 | 11          | 130         |
|              | 1993        | 0.00                   | 0.04        | 0.00                 | 1.00                 | 0.00                   | 0.05        | 0.05                 | 1.00                 | 11          | 130         |
|              |             |                        |             |                      |                      |                        |             |                      |                      |             |             |
| 15km         | 1981        | 0.00                   | 0.04        | 0.00                 | 1.00                 | 0.00                   | 0.05        | 0.05                 | 1.00                 | 11          | 43          |
|              | 1982        | 0.00                   | 0.04        | 0.00                 | 1.00                 | 0.00                   | 0.04        | 0.04                 | 1.00                 | 11          | 43          |
|              | 1983        | 0.00                   | 0.04        | 0.00                 | 1.00                 | 0.00                   | 0.05        | 0.05                 | 1.00                 | 11          | 43          |
|              | 1984        | 0.00                   | 0.03        | 0.00                 | 1.00                 | 0.00                   | 0.05        | 0.05                 | 1.00                 | 11          | 43          |
|              | 1985        | 0.00                   | 0.04        | 0.00                 | 1.00                 | 0.00                   | 0.05        | 0.05                 | 1.00                 | 11          | 43          |
|              | 1986        | 0.00                   | 0.04        | 0.00                 | 1.00                 | 0.00                   | 0.05        | 0.05                 | 1.00                 | 11          | 43          |
|              | 1987        | 0.00                   | 0.03        | 0.00                 | 1.00                 | 0.00                   | 0.05        | 0.05                 | 1.00                 | 11          | 43          |
|              | 1988        | 0.00                   | 0.03        | 0.00                 | 1.00                 | 0.00                   | 0.05        | 0.05                 | 1.00                 | 11          | 43          |
|              | 1989        | 0.00                   | 0.04        | 0.00                 | 1.00                 | 0.00                   | 0.05        | 0.05                 | 1.00                 | 11          | 43          |
|              | 1990        | 0.00                   | 0.04        | 0.00                 | 1.00                 | 0.00                   | 0.04        | 0.04                 | 1.00                 | 11          | 43          |
|              | 1991        | 0.00                   | 0.04        | 0.00                 | 1.00                 | 0.00                   | 0.05        | 0.05                 | 1.00                 | 11          | 43          |
|              | 1992        | 0.00                   | 0.04        | 0.00                 | 1.00                 | 0.00                   | 0.05        | 0.05                 | 1.00                 | 11          | 43          |
|              | 1993        | 0.00                   | 0.04        | 0.00                 | 1.00                 | 0.00                   | 0.05        | 0.05                 | 1.00                 | 11          | 43          |

455

456

457

| <b>H4</b>    |             | <b>One-tailed test</b> |             |                      |                      | <b>Two-tailed test</b> |             |                      |                      |             |             |
|--------------|-------------|------------------------|-------------|----------------------|----------------------|------------------------|-------------|----------------------|----------------------|-------------|-------------|
| <b>Scale</b> | <b>Year</b> | <b>P-value</b>         | <b>Size</b> | <b>Minimum Power</b> | <b>Maximum Power</b> | <b>P-value</b>         | <b>Size</b> | <b>Minimum Power</b> | <b>Maximum Power</b> | <b>Rows</b> | <b>Cols</b> |
| 1km          | 1981        | 0.86                   | 0.06        | 0.13                 | 1.00                 | 0.29                   | 0.05        | 0.05                 | 1.00                 | 11          | 3377        |
|              | 1982        | 0.29                   | 0.05        | 0.12                 | 1.00                 | 0.58                   | 0.04        | 0.04                 | 1.00                 | 11          | 3347        |
|              | 1983        | 0.07                   | 0.05        | 0.11                 | 1.00                 | 0.14                   | 0.05        | 0.05                 | 1.00                 | 11          | 3366        |
|              | 1984        | 0.00                   | 0.05        | 0.12                 | 1.00                 | 0.01                   | 0.05        | 0.05                 | 1.00                 | 11          | 3390        |
|              | 1985        | 0.04                   | 0.05        | 0.08                 | 0.89                 | 0.07                   | 0.05        | 0.05                 | 0.99                 | 11          | 12402       |
|              | 1986        | 0.00                   | 0.05        | 0.07                 | 0.79                 | 0.00                   | 0.05        | 0.05                 | 0.94                 | 11          | 12234       |
|              | 1987        | 0.00                   | 0.06        | 0.07                 | 0.76                 | 0.01                   | 0.05        | 0.05                 | 0.91                 | 11          | 12493       |
|              | 1988        | 0.01                   | 0.05        | 0.06                 | 0.91                 | 0.02                   | 0.05        | 0.05                 | 0.98                 | 11          | 12351       |
|              | 1989        | 0.01                   | 0.05        | 0.08                 | 0.79                 | 0.02                   | 0.05        | 0.05                 | 0.94                 | 11          | 11718       |
|              | 1990        | 0.01                   | 0.05        | 0.08                 | 0.80                 | 0.03                   | 0.05        | 0.05                 | 0.96                 | 11          | 11905       |
|              | 1991        | 0.13                   | 0.05        | 0.06                 | 0.74                 | 0.25                   | 0.05        | 0.05                 | 0.91                 | 11          | 11330       |
|              | 1992        | 0.01                   | 0.05        | 0.06                 | 0.69                 | 0.02                   | 0.04        | 0.04                 | 0.86                 | 11          | 11811       |
|              | 1993        | 0.00                   | 0.05        | 0.07                 | 0.61                 | 0.00                   | 0.05        | 0.05                 | 0.76                 | 11          | 10772       |
| 5km          | 1981        | 0.98                   | 0.05        | 0.17                 | 1.00                 | 0.04                   | 0.04        | 0.04                 | 1.00                 | 11          | 604         |
|              | 1982        | 1.00                   | 0.05        | 0.21                 | 1.00                 | 0.00                   | 0.04        | 0.04                 | 1.00                 | 11          | 605         |
|              | 1983        | 0.13                   | 0.05        | 0.18                 | 1.00                 | 0.26                   | 0.05        | 0.05                 | 1.00                 | 11          | 605         |
|              | 1984        | 0.04                   | 0.05        | 0.20                 | 1.00                 | 0.07                   | 0.04        | 0.04                 | 1.00                 | 11          | 604         |
|              | 1985        | 0.42                   | 0.05        | 0.21                 | 1.00                 | 0.84                   | 0.05        | 0.05                 | 1.00                 | 11          | 617         |
|              | 1986        | 0.07                   | 0.05        | 0.19                 | 1.00                 | 0.13                   | 0.05        | 0.05                 | 1.00                 | 11          | 607         |
|              | 1987        | 0.02                   | 0.04        | 0.17                 | 1.00                 | 0.03                   | 0.05        | 0.05                 | 1.00                 | 11          | 617         |
|              | 1988        | 0.00                   | 0.05        | 0.20                 | 1.00                 | 0.00                   | 0.05        | 0.05                 | 1.00                 | 11          | 619         |
|              | 1989        | 0.03                   | 0.04        | 0.19                 | 1.00                 | 0.06                   | 0.05        | 0.05                 | 1.00                 | 11          | 620         |
|              | 1990        | 0.00                   | 0.06        | 0.17                 | 1.00                 | 0.00                   | 0.05        | 0.05                 | 1.00                 | 11          | 611         |
|              | 1991        | 0.00                   | 0.04        | 0.16                 | 1.00                 | 0.00                   | 0.05        | 0.05                 | 1.00                 | 11          | 620         |
|              | 1992        | 0.00                   | 0.04        | 0.17                 | 1.00                 | 0.01                   | 0.04        | 0.04                 | 1.00                 | 11          | 621         |
|              | 1993        | 0.00                   | 0.04        | 0.15                 | 1.00                 | 0.00                   | 0.05        | 0.05                 | 1.00                 | 11          | 620         |

458

459



460

| <b>H4</b>    |             | <b>One-tailed test</b> |             |                      |                      | <b>Two-tailed test</b> |             |                      |                      |             |             |
|--------------|-------------|------------------------|-------------|----------------------|----------------------|------------------------|-------------|----------------------|----------------------|-------------|-------------|
| <b>Scale</b> | <b>Year</b> | <b>P-value</b>         | <b>Size</b> | <b>Minimum Power</b> | <b>Maximum Power</b> | <b>P-value</b>         | <b>Size</b> | <b>Minimum Power</b> | <b>Maximum Power</b> | <b>Rows</b> | <b>Cols</b> |
|              | 1982        | 0.02                   | 0.05        | 0.17                 | 1.00                 | 0.03                   | 0.06        | 0.06                 | 1.00                 | 11          | 129         |
|              | 1983        | 0.00                   | 0.04        | 0.16                 | 1.00                 | 0.00                   | 0.05        | 0.05                 | 1.00                 | 11          | 130         |
|              | 1984        | 0.00                   | 0.04        | 0.17                 | 1.00                 | 0.00                   | 0.05        | 0.05                 | 1.00                 | 11          | 130         |
|              | 1985        | 0.01                   | 0.05        | 0.15                 | 1.00                 | 0.02                   | 0.06        | 0.06                 | 1.00                 | 11          | 130         |
|              | 1986        | 0.00                   | 0.05        | 0.15                 | 1.00                 | 0.00                   | 0.05        | 0.05                 | 1.00                 | 11          | 130         |
|              | 1987        | 0.00                   | 0.05        | 0.16                 | 1.00                 | 0.00                   | 0.05        | 0.05                 | 1.00                 | 11          | 130         |
|              | 1988        | 0.00                   | 0.04        | 0.15                 | 1.00                 | 0.00                   | 0.05        | 0.05                 | 1.00                 | 11          | 130         |
|              | 1989        | 0.00                   | 0.05        | 0.15                 | 1.00                 | 0.00                   | 0.06        | 0.06                 | 1.00                 | 11          | 130         |
|              | 1990        | 0.00                   | 0.05        | 0.16                 | 1.00                 | 0.00                   | 0.05        | 0.05                 | 1.00                 | 11          | 130         |
|              | 1991        | 0.00                   | 0.04        | 0.14                 | 1.00                 | 0.00                   | 0.05        | 0.05                 | 1.00                 | 11          | 130         |
|              | 1992        | 0.00                   | 0.05        | 0.15                 | 1.00                 | 0.00                   | 0.06        | 0.06                 | 1.00                 | 11          | 130         |
|              | 1993        | 0.00                   | 0.05        | 0.13                 | 1.00                 | 0.00                   | 0.05        | 0.05                 | 1.00                 | 11          | 130         |
|              |             |                        |             |                      |                      |                        |             |                      |                      |             |             |
| 15km         | 1981        | 0.00                   | 0.04        | 0.09                 | 0.99                 | 0.00                   | 0.05        | 0.05                 | 1.00                 | 11          | 43          |
|              | 1982        | 0.00                   | 0.04        | 0.09                 | 1.00                 | 0.00                   | 0.05        | 0.05                 | 1.00                 | 11          | 43          |
|              | 1983        | 0.00                   | 0.03        | 0.10                 | 1.00                 | 0.00                   | 0.05        | 0.05                 | 1.00                 | 11          | 43          |
|              | 1984        | 0.00                   | 0.04        | 0.09                 | 0.99                 | 0.00                   | 0.04        | 0.04                 | 1.00                 | 11          | 43          |
|              | 1985        | 0.00                   | 0.04        | 0.09                 | 0.99                 | 0.00                   | 0.04        | 0.04                 | 1.00                 | 11          | 43          |
|              | 1986        | 0.00                   | 0.04        | 0.10                 | 0.99                 | 0.00                   | 0.05        | 0.05                 | 1.00                 | 11          | 43          |
|              | 1987        | 0.00                   | 0.05        | 0.09                 | 0.99                 | 0.00                   | 0.05        | 0.05                 | 1.00                 | 11          | 43          |
|              | 1988        | 0.00                   | 0.05        | 0.10                 | 0.99                 | 0.00                   | 0.05        | 0.05                 | 1.00                 | 11          | 43          |
|              | 1989        | 0.00                   | 0.05        | 0.09                 | 0.99                 | 0.00                   | 0.05        | 0.05                 | 1.00                 | 11          | 43          |
|              | 1990        | 0.00                   | 0.04        | 0.10                 | 1.00                 | 0.00                   | 0.05        | 0.05                 | 1.00                 | 11          | 43          |
|              | 1991        | 0.00                   | 0.04        | 0.09                 | 0.98                 | 0.00                   | 0.04        | 0.04                 | 1.00                 | 11          | 43          |
|              | 1992        | 0.00                   | 0.04        | 0.09                 | 0.99                 | 0.00                   | 0.05        | 0.05                 | 1.00                 | 11          | 43          |
|              | 1993        | 0.00                   | 0.04        | 0.09                 | 0.98                 | 0.00                   | 0.05        | 0.04                 | 1.00                 | 11          | 43          |

461
